# Supplementary material
Source: PubMed Central journal article supplement (PMC4311822)
Supplement: pnas.201420589SI.pdf [file pnas.201420589SI.pdf]

# Supporting Information

Kaneuchi et al. 10.1073/pnas.1420589112

## SI Materials and Methods

**Fly Strains.** *attP*(ZH-51D), P{y[+7.7]=CaryIP}*su*(Hw)*attP5*, P{y[+7.7]=CaryIP}*su*(Hw)*attP2*, *mata4-GAL-VP16*, *itpr<sup>ka901</sup>*, *itpr<sup>μg3</sup>*, *hsFLP<sup>1</sup>*, and shRNA fly stocks (1) were obtained from the Bloomington Stock Center. For generation of germline clones, neoFRT(82B) PBac{SAstopDsRed}LL02136 (2), which was crossed to *itpr* mutants to generate the recombinant chromosomes with FRT, and neoFRT(82B) *ovo<sup>D1-18</sup>* were obtained from the *Drosophila* Genetic Resource Center (Kyoto, Japan).

**DNA Constructs and Transgenic Flies.** *pUASp-GFP-aequorin-attB* (3) used in the transgenic flies in Fig. S1B and Fig. S3 and in Movies S4 and S6 was constructed as follows. The appropriate EcoRV and PstI fragment of *pUASp* and the EcoRI and XhoI fragment that contains the entire ORF for GFP-aequorin from pGGA2 (4) were cloned into a modified version of pUAST-*attB* (5). The construct was integrated into the *attP* site at M{3xP3-RFP.*attP*}ZH-51D (5) in the *y w* genetic background, and transgenic lines were stabilized by standard procedures.

**Germline Clonal Analyses.** Germline clones of *itpr<sup>ka901</sup>*, a functionally null allele, and *itpr<sup>μg3</sup>*, an altered sensitivity allele of *Itp-r83A/IP3R* (6, 7), were produced by the flippase-dominant female

sterile technique (8). *mata4-GAL-VP16*, *UASp-GFP-GCaMP3*; neoFRT(82B), *itpr<sup>ka901</sup>/TM6B*, *Tb* or *mata4-GAL-VP16*, *UASp-GFP-GCaMP3*; neoFRT (82B), *itpr<sup>μg3</sup>/TM6B*, *Tb*; or *mata4-GAL-VP16*, *UASp-GFP-GCaMP3/+*; neoFRT(82B)/*TM6B*, *Tb* (control) females were crossed to *hsFLP<sup>1</sup>/Y*; neoFRT(82B), *ovo<sup>D1-18</sup>/TM3*, *Sb* males. Third instar larvae were heat-treated twice for 2 h at 37 °C, and the eclosed *Tb<sup>+</sup> Sb<sup>+</sup>* females were used for the experiment. As noted in the text, the germline clone eggs obtained in these experiments were fragile, but it is not certain that that was due to the *itpr* mutation, as control eggs in this genetic background also showed fragility.

**Bioluminescence Microscopy.** GFP-aequorin-based bioluminescence and BRET signal was imaged using a LV200 bioluminescence imaging system (Olympus). Oocytes containing GFP-aequorin were dissected from transgenic females (*mata4-GAL-VP16>UASp-GFP-aequorin*) and individually incubated with 50 μL of isotonic HL3 saline (9) containing 2 mM Ca<sup>2+</sup> and 100 μM coelenterazine (JNC) in a glass-bottomed dish (MAT-TEK) for 3–5 h at room temperature. The dish containing the oocytes was placed in the imaging system, and 100 μL of ddH<sub>2</sub>O was added to induce activation by hypotonic stimulation. Images were captured at the rate of one frame per second.

1. Ni JQ, et al. (2008) Vector and parameters for targeted transgenic RNA interference in *Drosophila melanogaster*. *Nat Methods* 5(1):49–51.
2. Schuldiner O, et al. (2008) piggyBac-based mosaic screen identifies a postmitotic function for cohesin in regulating developmental axon pruning. *Dev Cell* 14(2):227–238.
3. Baubert V, et al. (2000) Chimeric green fluorescent protein-aequorin as bioluminescent Ca<sup>2+</sup> reporters at the single-cell level. *Proc Natl Acad Sci USA* 97(13):7260–7265.
4. Martin JR, Rogers KL, Chagneau C, Brület P (2007) In vivo bioluminescence imaging of Ca signalling in the brain of *Drosophila*. *PLoS ONE* 2(3):e275.
5. Bischof J, Maeda RK, Hediger M, Karch F, Basler K (2007) An optimized transgenesis system for *Drosophila* using germ-line-specific phiC31 integrases. *Proc Natl Acad Sci USA* 104(9):3312–3317.
6. Joshi R, Venkatesh K, Srinivas R, Nair S, Hasan G (2004) Genetic dissection of *itpr* gene function reveals a vital requirement in aminergic cells of *Drosophila* larvae. *Genetics* 166(1):225–236.
7. Srikanth S, et al. (2004) Functional properties of the *Drosophila melanogaster* inositol 1,4,5-trisphosphate receptor mutants. *Biophys J* 86(6):3634–3646.
8. Chou TB, Perrimon N (1996) The autosomal FLP-DFS technique for generating germline mosaics in *Drosophila melanogaster*. *Genetics* 144(4):1673–1679.
9. Stewart BA, Atwood HL, Renger JJ, Wang J, Wu CF (1994) Improved stability of *Drosophila* larval neuromuscular preparations in haemolymph-like physiological solutions. *J Comp Physiol A Neuroethol Sens Neural Behav Physiol* 175(2):179–191.

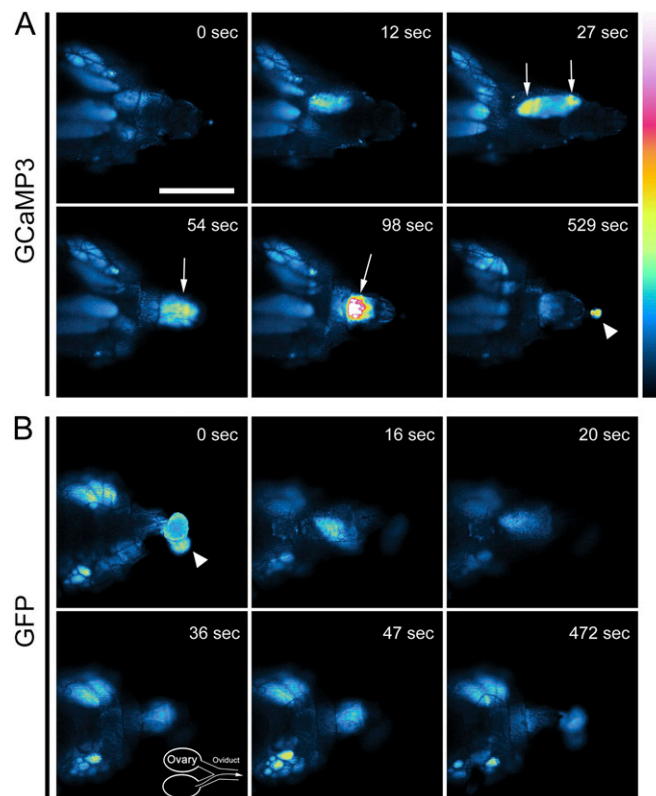

**Fig. S1.**  $\text{Ca}^{2+}$  rise in oocytes during ovulation in vivo. We imaged the ovulation process under a confocal laser-scanning fluorescence microscope (Nikon C1si) for a more detailed view; ventral views of the females are shown; anterior is to the left. (A) Shows the rise in calcium as an egg is ovulated; these are still frames from Movie S3. In vivo  $\text{Ca}^{2+}$  imaging was performed on transgenic female flies expressing GCaMP3 in their oocytes. B, which shows still frames from Movie S4, is the control. The oocytes imaged here were in transgenic *mat $\alpha$ 4-GAL-VP16>UASp-GFP-aequorin* females. The GFP-aequorin expressed in the oocytes of these females does not fluoresce in response to calcium unless coelenterazine is included to cause aequorin luminescence (which would then induce GFP fluorescence by BRET). No coelenterazine was present in these experiments. Thus, the fluorescence of their GFP-aequorin is insensitive to calcium levels and serves as negative control for basal GFP fluorescence. An intense fluorescence signal is induced in oocytes as they are ovulated in females expressing GCaMP3 but not in oocytes of females that expressed GFP-aequorin. Arrows indicate fluorescence signals corresponding to descending eggs. Ovaries are weakly fluorescent, and there is strong auto-fluorescence in the feces (arrowheads). The fluorescent signal of an egg increased as it moved downward (toward the posterior end of the abdomen), and the intensity was at maximum when the oocytes descended to a certain position, most likely the uterus (98 s). The time after release from the ovary is indicated in each panel. Fluorescence intensities are presented using a false-color scale on the right side. (Scale bar, 500  $\mu\text{m}$ .) There is a schematic for orientation in B, Lower Left. This figure typifies what we saw in >20 ovulating oocytes. Peristaltic motions inside the female made the image occasionally go out of sharpest focus.

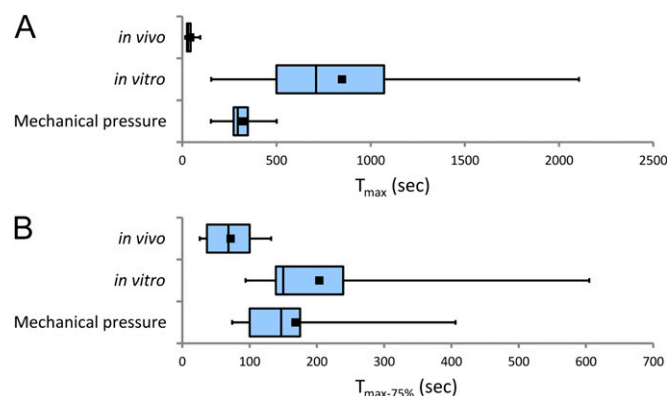

**Fig. S2.** Quantitative analysis of  $\text{Ca}^{2+}$  fluorescence intensity ( $\Delta F/F_0$ ). (A)  $T_{\text{max}}$  represents the time required to reach the maximum intensity from the time 0 at which the fluorescence intensity started to increase. The increase is fastest in vivo. Mechanical pressure in vitro accelerates the in vitro rate. (B)  $T_{\text{max-75}}$  represents the time required to return to 75% of the maximum intensity from the time of peak ( $T_{\text{max}}$ ).  $n = 10$  in vivo, 14 in vitro, and 8 mechanical pressure.

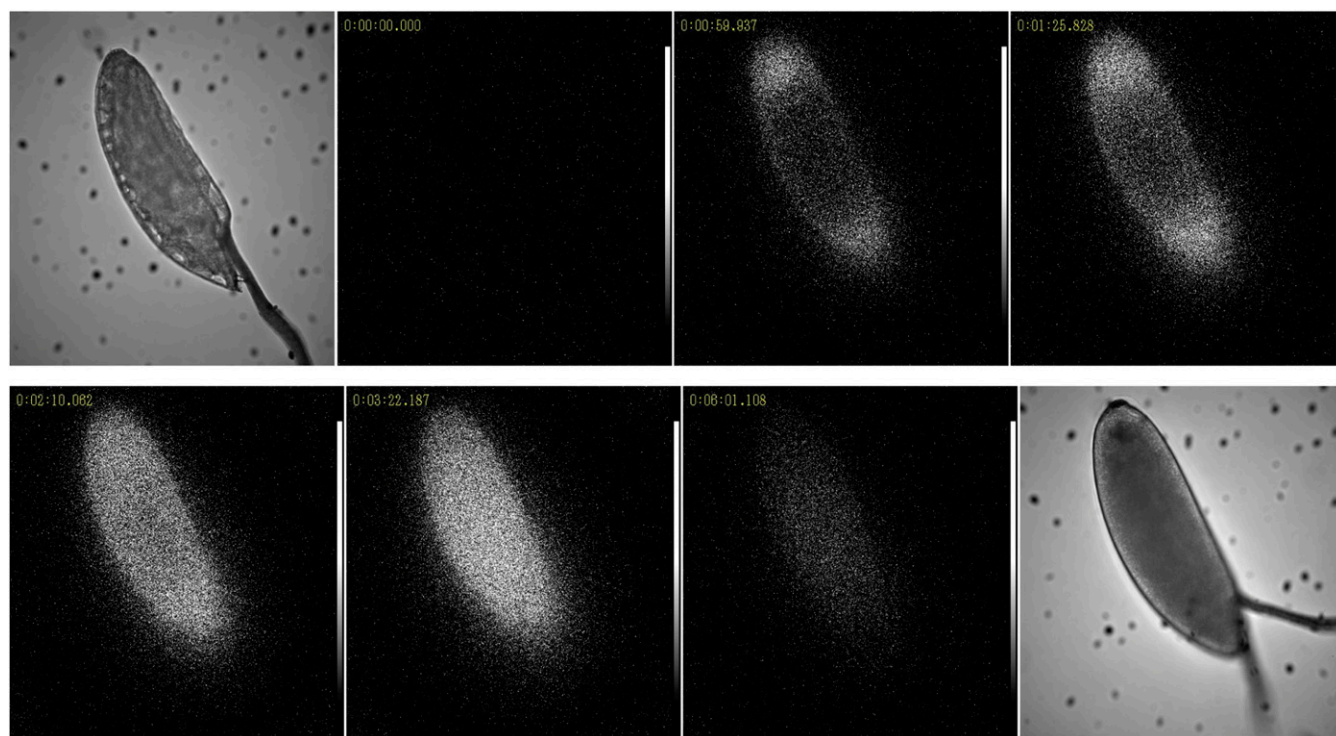

**Fig. S3.**  $\text{Ca}^{2+}$  influx visualized by bioluminescence with GFP-aequorin. Oocytes were dissected from transgenic female flies expressing GFP-aequorin (3) in their oocytes (*meta4-GAL-VP16>UASp-GFP-aequorin*) in HL3 buffer (9) and incubated with 50 mM coelenterazine and 2 mM  $\text{CaCl}_2$  in HL3 buffer for 3 h. HL3 was used instead of IB because uptake of the substrate coelenterazine was more efficient in HL3. In vitro activation was induced by diluting HL3 with water.  $\text{Ca}^{2+}$  imaging was performed using an Olympus Bioluminescence Imaging System LV200 to visualize the calcium-stimulated signal emitted from GFP as a result of BRET from the aequorin moiety. Panels are from Movie S6. The pattern of the observed signal was consistent with the calcium wave observed with GCaMP3 oocytes (Figs. 1 and 2 and Fig. S1; Movies S1, S3, S5, and S7). *Upper Left* and *Lower Right* are brightfields of the panels to their right and left, respectively.

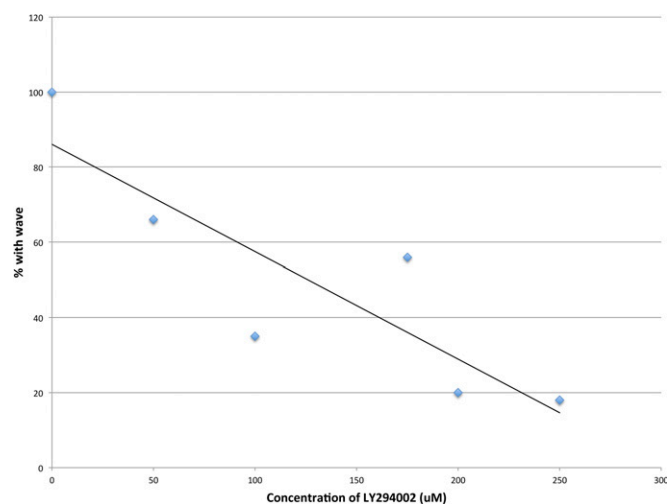

**Fig. S4.** LY294002 inhibits the calcium rise. GCaMP3-containing oocytes were incubated in a range of concentrations of LY294002 (or control), and the calcium wave was imaged. Methods and analysis were as in Fig. 3. The percentage of oocytes that showed a calcium wave is graphed. LY294002 at all concentrations inhibited the calcium rise (50  $\mu\text{M}$  LY294002,  $P = 0.0230$ ; 100  $\mu\text{M}$  LY294002,  $P < 0.0001$ ; 175  $\mu\text{M}$  LY294002,  $P = 0.0014$ ; 200  $\mu\text{M}$  LY294002,  $P < 0.0001$ ; 250  $\mu\text{M}$  LY294002,  $P < 0.0001$ ), and the effect was dose-responsive.  $n = 9$ –17 tested per concentration.



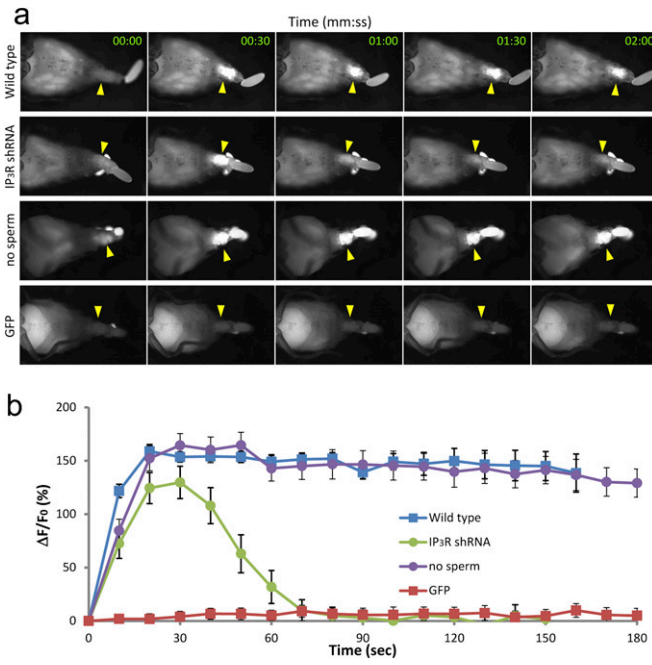

**Movie S2.** In vivo imaging at dissection scope resolution of activating oocytes from control transgenic flies expressing GFP in their oocytes. See text and the legend to Fig. 1A for details.

[Movie S2](#)

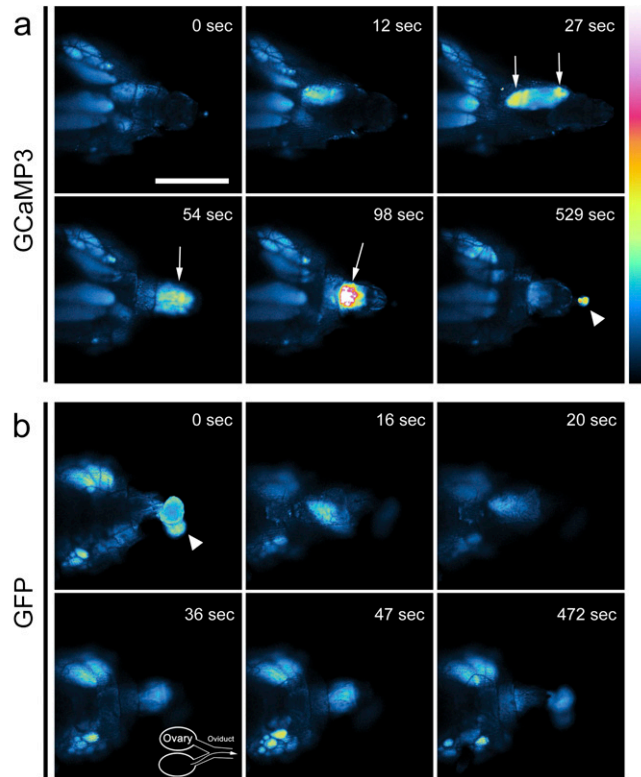

**Movie S3.** In vivo imaging at high magnification of  $Ca^{2+}$  flux in activating oocytes from transgenic flies expressing GCaMP3 in their oocytes. See text and the legend to Fig. S1 for details.

[Movie S3](#)





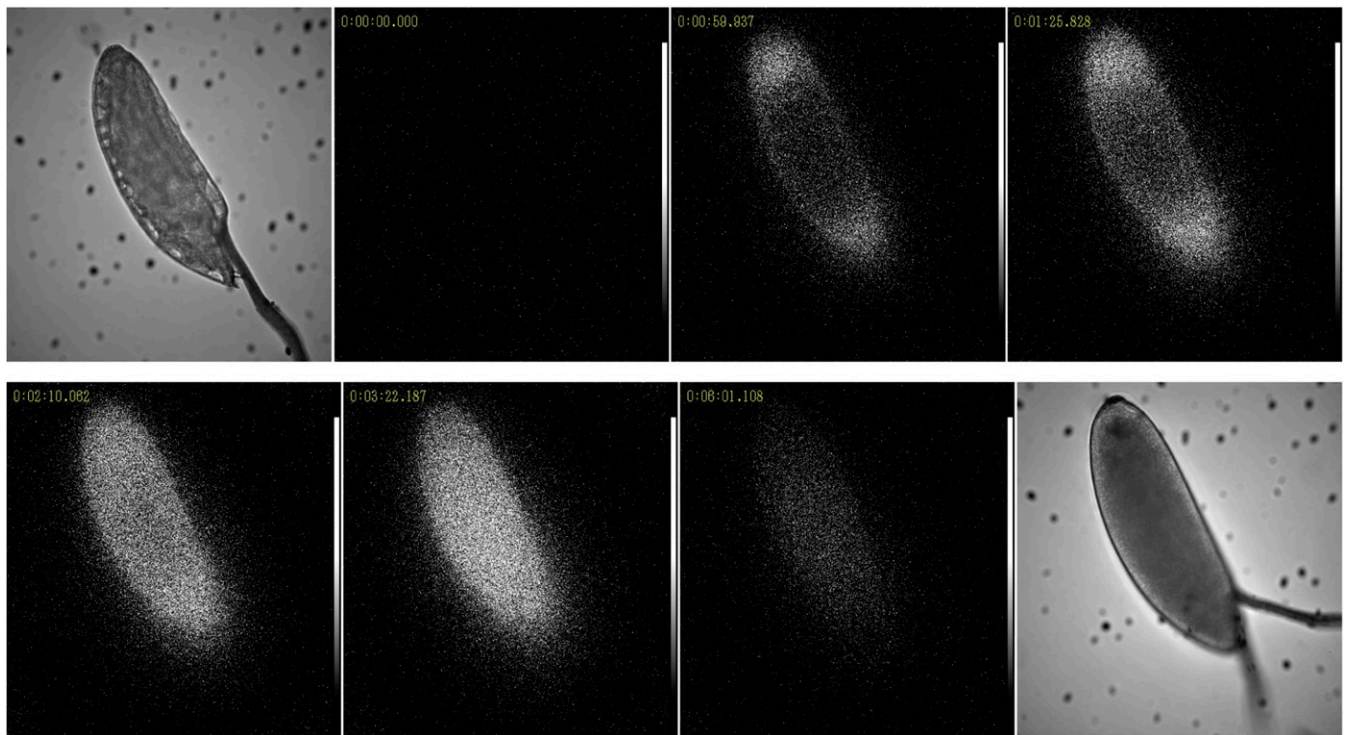

**Movie S6.** Ca<sup>2+</sup> flux in GFP-aequorin oocytes activated in vitro in the presence of coelenterazine as visualized by bioluminescence. See text and legend to Fig. S3 for details.

[Movie S6](#)

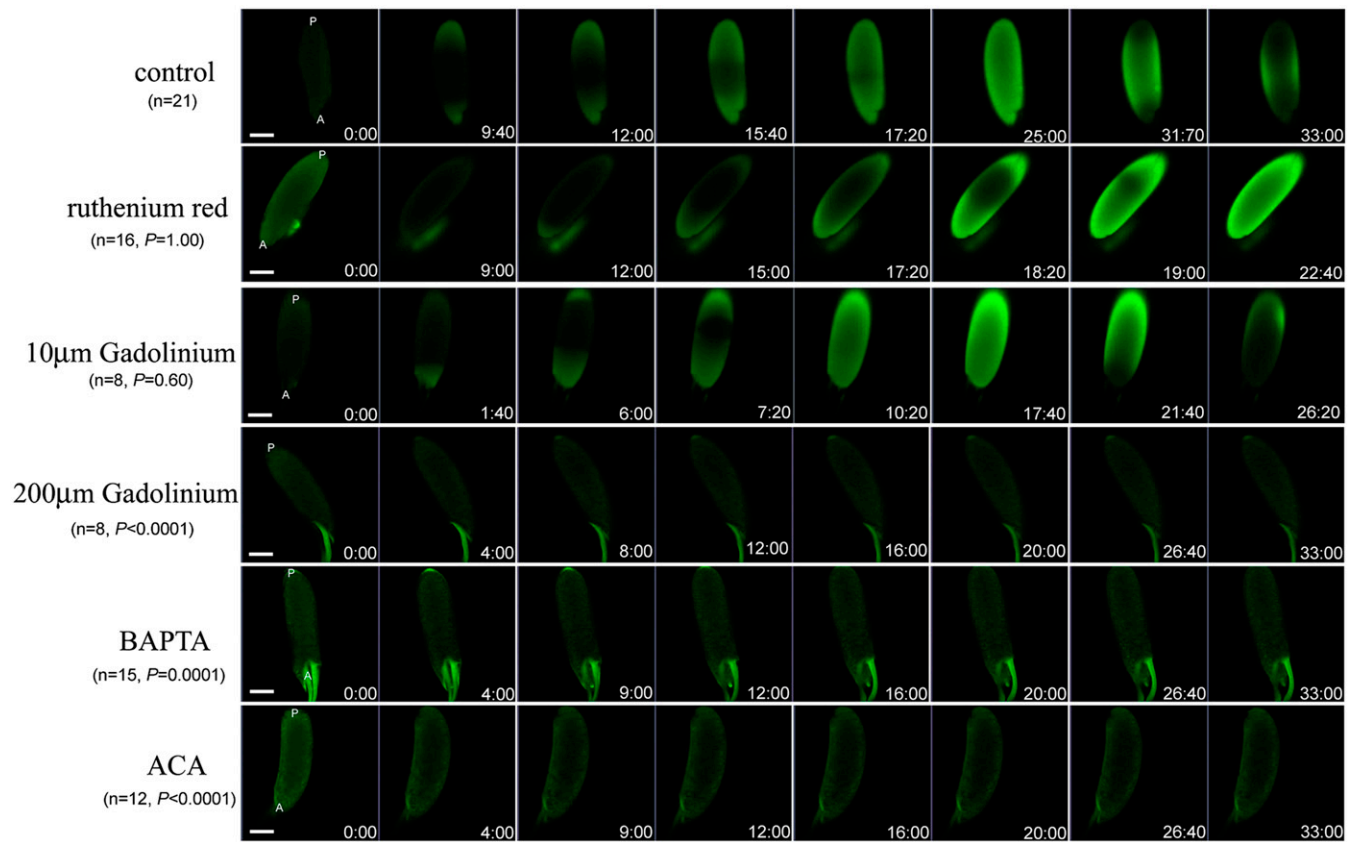

**Movie 57.** Oocyte swelling precedes  $\text{Ca}^{2+}$  rise. The oocyte shown was dissected from a *nos-GCaMP* female and incubated in vitro under control conditions. See text and legend to Fig. 3 for details.

[Movie 57](#)

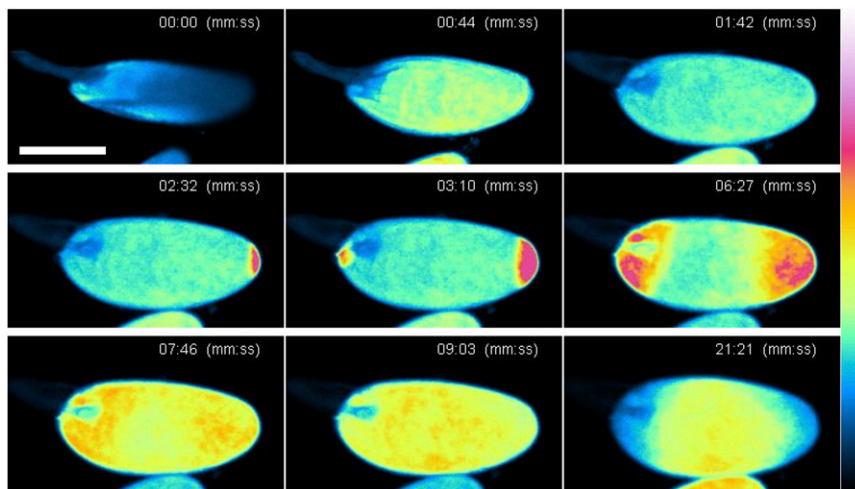

**Movie 58.**  $\text{Ca}^{2+}$  flux in GCaMP-containing oocytes upon mechanical stimulation. See text and legend to Fig. 4 for details.

[Movie 58](#)



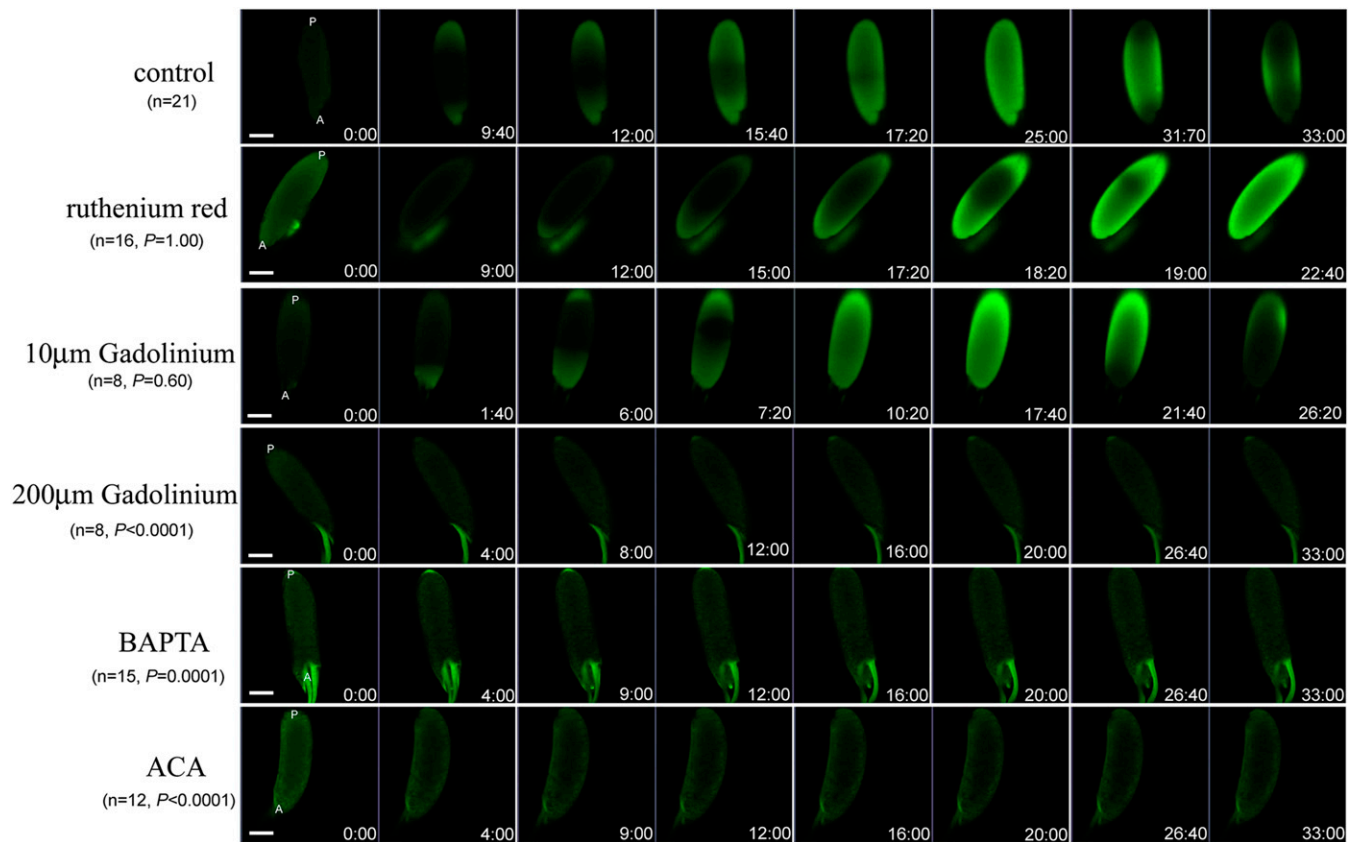

**Movie S9.**  $\text{GdCl}_3$  (10  $\mu\text{M}$ ) does not prevent the calcium wave. The oocyte shown was dissected from a *nos-GCaMP* female, and incubated in vitro. See text and legend to Fig. 3 for details.

[Movie S9](#)

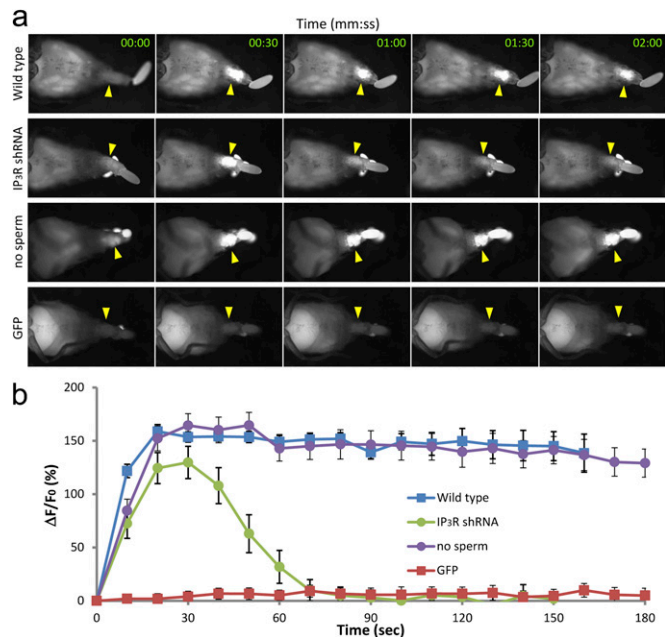

**Movie S10.** In vivo imaging at dissection scope resolution of  $\text{Ca}^{2+}$  flux in activating oocytes from transgenic flies expressing GCaMP3, but also knocked down for IP3R, in their oocytes. See text, and the legend to Fig. 1A, for details.

[Movie S10](#)
